Anesthesiology  
1996; 84:1435-42  
© 1996 American Society of Anesthesiologists, Inc.  
Lippincott-Raven Publishers

## Nitric Oxide Mediates Hepatic Cytochrome P450 Dysfunction Induced by Endotoxin

Claudia M. Müller, M.D.,\* Annette Scierka, M.S.,† Richard L. Stiller, Ph.D.,‡ Yong-Myeong Kim, Ph.D.,§ D. Ryan Cook, M.D.,|| Jack R. Lancaster, Jr., Ph.D.,# Charles W. Buffington, M.D.,\*\* W. David Watkins, M.D., Ph.D.††

**Background:** Animals subjected to immunostimulatory conditions (sepsis) exhibit decreased total cytochrome P450 content and decreased P450-dependent drug metabolism. Cytochrome P450 function is of clinical significance because it mediates the metabolism of some opioid and hypnotic drugs. The authors tested the hypothesis that reduced P450 function and decreased drug metabolism in sepsis are mediated by endotoxin-enhanced synthesis of nitric oxide.

**Methods:** Hepatic microsomes were prepared from male Sprague-Dawley rats in nontreated rats, rats pretreated with phenobarbital and rats receiving aminoguanidine or N<sup>G</sup>-L-monomethyl-arginine alone. Nitric oxide synthesis was aug-

mented for 12 h with a single injection of bacterial lipopolysaccharides. Nitric oxide synthase was inhibited with aminoguanidine or N<sup>G</sup>-L-monomethyl-arginine during the 12 h of endotoxemia in some animals. Plasma nitrite and nitrate concentrations were measured *in vivo*, and total microsomal P450 content, and metabolism of ethylmorphine and midazolam *in vitro*.

**Results:** Administration of endotoxin increased plasma nitrite and nitrate concentrations, decreased total cytochrome P450 content, and decreased metabolism of ethylmorphine and midazolam. Inhibition of nitric oxide formation by aminoguanidine or N<sup>G</sup>-L-monomethyl-arginine partially prevented the endotoxin-induced effects in the nontreated and phenobarbital-treated groups. Aminoguanidine or N<sup>G</sup>-L-monomethyl-arginine alone did not have an effect on either total cytochrome P450 content or P450-dependent drug metabolism. Plasma nitrite and nitrate concentrations correlated significantly negatively with P450 content (nontreated  $r = -0.88$ , phenobarbital  $r = -0.91$ ), concentrations of formed formaldehyde (nontreated  $r = -0.87$ , phenobarbital  $r = -0.95$ ), and concentrations of midazolam metabolites (4-OH midazolam nontreated  $r = -0.88$ , phenobarbital  $r = -0.93$ , and 1-OH midazolam nontreated  $r = -0.88$ , phenobarbital  $r = -0.97$ ).

**Conclusions:** Altered hepatic microsomal ethylmorphine and midazolam metabolism during sepsis is mediated in large part by nitric oxide. (Key words: Biotransformation: hydroxylation; induction; microsomal; N-demethylation. Enzymes, cytochrome P450: CYP2B1; CYP2C6/11; CYP3A1/2. Interactions, drug: nitric oxide; sepsis. Metabolism, drug: ethylmorphine; midazolam.)

\* International Fellow in Anesthesiology, Department of Anesthesiology/Critical Care Medicine.

† Department of Anesthesiology, Children's Hospital of Pittsburgh.

‡ Associate Professor of Pharmacology, Department of Anesthesiology/Critical Care Medicine Research Laboratories.

§ Assistant Professor, Department of Surgery.

|| Professor and Chief, Department of Anesthesiology/Critical Care Medicine, Children's Hospital of Pittsburgh.

# Associate Professor, Departments of Surgery, Anesthesiology/Critical Care Medicine, and Pharmacology. Current position: Department of Physiology, Louisiana State University Medical Center, New Orleans, Louisiana.

\*\* Professor, Department of Anesthesiology/Critical Care Medicine.

†† Professor and Vice Chairman, Department of Anesthesiology/Critical Care Medicine.

Received from the Departments of Anesthesiology and Critical Care Medicine, Surgery, and Pharmacology, University of Pittsburgh School of Medicine, Pittsburgh, Pennsylvania. Submitted for publication February 10, 1995. Accepted for publication January 31, 1996. Supported by research grants from the American Cancer Society BE-128 (to Dr. Lancaster), the National Institute of Diabetes and Digestive and Kidney Diseases DK46935-01 (to Dr. Lancaster), and the Max Kade Foundation Inc., New York, New York (to Dr. Müller and Dr. Watkins). Presented in part at the annual meetings of The Federation of American Societies of Experimental Biology, Anaheim, California, April 24-28, 1994, and the Association of University Anesthesiologists, Chicago, Illinois, May 4-7, 1994.

Address reprint requests to Dr. Müller; Department of Anesthesiology and General Intensive Care, General Hospital of Vienna (University Hospital), Wahringer Gürtel 18-20, A-1090 Vienna, Austria.

HEPATIC metabolism of drugs is reduced in sepsis.<sup>1</sup> Although this phenomenon was described 40 years ago, the mechanism is still not completely understood. Immunostimulation by endotoxin during sepsis produces substantial quantities of nitric oxide, a free radical that interferes with a number of key metabolic enzymes in the body by oxidizing heme or nonheme iron and iron-sulfur complexes.<sup>2-7</sup> Nitric oxide transformation of hemoglobin to methemoglobin is a well-known example of this reaction. The cytochrome P450 isoenzymes in the liver that metabolize drugs also contain iron, raising the possibility that nitric oxide is a factor in decreased drug metabolism seen during sepsis.<sup>8</sup> This phenomenon



has been previously demonstrated,<sup>9,10</sup> but the specificity of nitric oxide for various isoforms has not been examined.

We measured plasma nitrite and nitrite (NOx) as markers for nitric oxide production and correlated the concentrations of these compounds with total hepatic microsomal cytochrome P450 content in a rat sepsis model. We also correlated plasma NOx with the metabolic function of P450 isozymes responsible for the biotransformation of an opioid (ethylmorphine) and a hypnotic drug (midazolam). We used microsomal enzyme induction with phenobarbital and nitric oxide synthesis inhibition to modulate the system in intact animals.

## Materials and Methods

The rat isoforms *CYP* 2B1, *CYP* 2C6/11, and *CYP* 3A2 have high catalytic activity for N-demethylation of ethylmorphine<sup>11</sup> (*CYP* 3A3 in humans<sup>12</sup>), and *CYP* 3A1 has main metabolizing activity for midazolam (*CYP* 3A3/4 in humans<sup>13</sup>).

### Chemicals

Midazolam, 4-OH and 1'-OH midazolam (8-Chloro-6-(2-fluorophenyl)-4H-imidazol[1,5-a][1,4]benzodiazepine-1-methanol) were donated by Hoffman La Roche (Nutley, NJ). Unless specified, reagents were obtained from Sigma Chemical (St. Louis, MO).

### Preparation of Hepatic Microsomes

The protocol was approved by the Institutional Animal Care and Use Committee. Microsomal cytochrome P450 was induced in adult male Sprague Dawley rats (weighing 250–300 g) by intraperitoneal injection of phenobarbital in saline (80 mg/kg, every 24 h for 4 consecutive days).<sup>14</sup> Rats had free access to water and food. General anesthesia was initiated with pentobarbital (70 mg/kg, intraperitoneal), and oxygen by mask. The portal vein was cannulated and blood samples were drawn for subsequent plasma nitric oxide analysis. Livers were perfused with 200 ml iced saline to remove most of the blood and then were quickly excised and stored at  $-80^{\circ}\text{C}$ . Microsomes were prepared by homogenizing the liver tissue, thawed in ice water in seven volumes of phosphate-buffered solution (PBS) containing NaCl 136.9 mM, KCl 2.2 mM,  $\text{NaH}_2\text{PO}_4$  8.1 mM,  $\text{KH}_2\text{PO}_4$  1.5 mM, pH 7.4, in a glass homogenizer with a polytetrafluoroethylene pestle for 3 min on ice.

Homogenates were centrifuged at  $10,000 \times g$   $4^{\circ}\text{C}$  for 30 min to remove unbroken cells, lysosomes, and mitochondria. Microsomal pellets were obtained by further centrifugation of the supernatant at  $105,000 \times g$  for 1 h at  $4^{\circ}\text{C}$ . The pellets were washed in cold PBS, recentrifuged for 40 min at  $105,000 \times g$   $4^{\circ}\text{C}$  to obtain washed microsomes, which were resuspended in PBS and used for further assays as described later. Microsomal protein concentrations were determined by the method of Lowry *et al.* using bovine serum albumin as the protein standard.<sup>15</sup> Total microsomal cytochrome P450 content was quantified spectrophotometrically (Hitachi Double Beam Spectrophotometer, Danbury, CT) from the carbon monoxide-reduced difference spectrum.<sup>16,17</sup>

### Stimulation and Inhibition of Nitric Oxide

Table 1 outlines the experimental design used to compare the effects of aminoguanidine and  $\text{N}^G$ -L-monomethyl-arginine (L-NMMA), phenobarbital treatment, lipopolysaccharide (LPS) treatment, and nitric oxide synthase (NOS) inhibition on nitric oxide formation, cytochrome P450 content, and drug metabolism. To test the effect of nitric oxide production *in vivo* on hepatic cytochrome P450 activity, rats were divided into two groups: either nontreated receiving saline only or phenobarbital-treated (as described earlier). Rats were given purified endotoxin (LPS, *E. coli*: 0111:B4, Sigma) as a single dose (10 mg/kg, intraperitoneal). To inhibit nitric oxide formation, rats receiving LPS were treated with either aminoguanidine (80  $\mu\text{moles/kg}$  in PBS, intraperitoneal) or L-NMMA (80  $\mu\text{mol/kg}$  in PBS, intraperitoneal) beginning 90 min after the LPS treatment and repeated at 3-h intervals thereafter, for a total dosage of 320  $\mu\text{moles/kg}$ . To examine the effects of aminoguanidine and L-NMMA alone, the same regimen was given to untreated animals. Rats were killed 12 h after LPS injection by cardiac arrest during the perfusion with iced saline.

### Assays

**Plasma Nitrate.** Total NOx (nitrite plus nitrate,  $\text{NO}_2^-$  plus  $\text{NO}_3^-$ ) in plasma was determined by conversion to the corresponding 1-nitro-2,4,6-trimethoxybenzene (NTMB) derivatives in the presence of an internal standard ( $^{15}\text{N}$ ) $\text{NaNO}_2$  and subsequently analyzed by gas chromatography/mass spectrometry, monitoring  $m/z$  NTMB = 213 and  $m/z$   $^{15}\text{NTMB}$  = 214.<sup>18</sup> This assay proved to be reproducible in our laboratory, with an  $r^2 = 0.999 \pm 0.00027$  and a coefficient of vari-



## HEPATIC DRUG METABOLISM IN SEPSIS

Table 1. Hepatic Microsomal Cytochrome P450 Content and Activity

|                                          | Nontreated (NT) |                 |                 |                 | Phenobarbital-treated (PB) |                   |                  |                  |
|------------------------------------------|-----------------|-----------------|-----------------|-----------------|----------------------------|-------------------|------------------|------------------|
|                                          | Endotoxemia     |                 |                 |                 | Endotoxemia                |                   |                  |                  |
|                                          | NOS Inhibition  |                 |                 |                 | NOS Inhibition             |                   |                  |                  |
|                                          | Aminoguanidine  | L-NMMA          | Aminoguanidine  | L-NMMA          | Aminoguanidine             | L-NMMA            | Aminoguanidine   | L-NMMA           |
| NOx ( $\mu\text{g}/\text{mL}$ in plasma) | 4.13 $\pm$ 1.22 | 4.08 $\pm$ 1.34 | 4.9 $\pm$ 1.8   | 136.5 $\pm$ 9.3 | 43.51 $\pm$ 6.05†          | 60.55 $\pm$ 4.45† | 4.5 $\pm$ 1.1    | 144.4 $\pm$ 15.0 |
| P450 content*                            | 0.93 $\pm$ 0.03 | 0.92 $\pm$ 0.02 | 0.92 $\pm$ 0.02 | 0.58 $\pm$ 0.03 | 0.75 $\pm$ 0.02†           | 0.66 $\pm$ 0.02†  | 2.53 $\pm$ 0.05  | 1.37 $\pm$ 0.04  |
| Ethylmorphine metabolism                 |                 |                 |                 |                 |                            |                   |                  |                  |
| Formaldehyde formed†                     | 9.11 $\pm$ 0.25 | 9.36 $\pm$ 0.32 | 9.12 $\pm$ 0.35 | 4.04 $\pm$ 0.18 | 7.33 $\pm$ 0.24†           | 6.62 $\pm$ 0.28†  | 21.15 $\pm$ 0.66 | 10.3 $\pm$ 0.67  |
| Midazolam metabolism                     |                 |                 |                 |                 |                            |                   |                  |                  |
| 4-OH midazolam formed†                   | 0.82 $\pm$ 0.02 | 0.80 $\pm$ 0.02 | 0.81 $\pm$ 0.03 | 0.27 $\pm$ 0.02 | 0.66 $\pm$ 0.03†           | 0.57 $\pm$ 0.03†  | 26.23 $\pm$ 0.9  | 9.6 $\pm$ 0.5    |
| 1'-OH midazolam formed†                  | 3.17 $\pm$ 0.1  | 3.16 $\pm$ 0.15 | 3.1 $\pm$ 0.12  | 1.07 $\pm$ 0.06 | 2.6 $\pm$ 0.08†            | 2.3 $\pm$ 0.07†   | 111.0 $\pm$ 2.45 | 44.7 $\pm$ 3.7   |
|                                          |                 |                 |                 |                 |                            |                   | 21.1 $\pm$ 0.8†  | 18.9 $\pm$ 0.8†  |
|                                          |                 |                 |                 |                 |                            |                   | 91.7 $\pm$ 1.7†  | 83.3 $\pm$ 3.4†  |

Data represent the mean  $\pm$  SEM; n = 6 for all groups. See table 2 for ANOVA results.

\* Nanomoles total P450 content per milligram microsomal protein.

† Nanomoles per milligram microsomal protein per minute.

‡ Significant ( $P < 0.002$ ) by unpaired  $t$  test versus endotoxemia alone.

ation of 7.2%, and linear over a wide range of standard concentrations (2.5–500  $\mu\text{g}/\text{mL}$  NTMB). Practically, the lower limit of sensitivity of this assay in plasma was 200 ng NTMB.

**Ethylmorphine.** N-demethylation of ethylmorphine was assayed by determining the amount of formaldehyde formed using the method of Nash.<sup>19</sup> The microsomal preparation (50–100  $\mu\text{g}$  protein) was preincubated in PBS at 37°C for 10 min, and the reaction was started with the addition of substrate, ethylmorphine (1.5  $\mu\text{moles}$ ), in a final volume of 600  $\mu\text{L}$ , pH 7.4, containing 0.6 mM reduced form of nicotinamide-adenine dinucleotide phosphate, 5 mM  $\text{MgCl}_2$ , and 15 mM neutralized hydrazinecarboxamide. The reaction mixture was placed in polycarbonate vials in a shaking water bath for 10 min at 37°C under conditions of minimal light and air environment. The reactions were terminated by the addition of 200  $\mu\text{L}$  15% zinc sulfate heptahydrate, and the mixture was shaken another 5 min, then 200  $\mu\text{L}$  saturated barium hydroxide octahydrate was added. The resultant mixture was centrifuged for 8 min at 6,000  $\times g$ ; 335  $\mu\text{L}$  Nash reagent (30.0 g ammonium acetate, 0.4 mL acetyl acetone in a total of 100 mL distilled water) was added to 840  $\mu\text{L}$  of the clear reaction solution, mixed thoroughly and heated at 60°C for 30 min. Formaldehyde formation was measured spectrophotometrically at 415 nm with a tissue blank set to 0 absorbance, and quantified using a standard formaldehyde (0.25–3  $\mu\text{g}/\text{mL}$ ) curve. The standard curve had an  $r^2 = 0.998 \pm 0.0008$  and a coefficient of variation of 5.6%.

**Midazolam.** CYP 3A1 specific activity was assessed measurement of the 4-OH and 1'-OH metabolites of midazolam. Microsomal preparation (50–100  $\mu\text{g}$  protein) was incubated in polycarbonate tubes in PBS, pH 7.4, at 37°C for 10 min, in a final volume of 100  $\mu\text{L}$ , in the presence of an NADPH-generating system (5 mM glucose 6-phosphate, 0.15 units of glucose 6-phosphate dehydrogenase, 1 mM nicotinamide-adenine dinucleotide phosphate, and 5 mM  $\text{MgCl}_2$ ). The reaction was started by the addition of substrate, midazolam, as a tenfold concentrate in 20% acetone (60  $\mu\text{M}$ , final concentration), and was conducted in a shaking water bath for 10 min at 37°C under conditions of minimal light and air environment.<sup>13</sup> The reaction was stopped by adding 100  $\mu\text{L}$  cold methanol. Protein was precipitated at 10,000  $\times g$  for 6 min, and an aliquot of the supernatant was injected for high-performance liquid chromatographic analysis. The high-performance liquid chromatography system consisted of a pump (Model



510, Millipore Waters, Milford, MA), a programmable absorbance ultraviolet detector (Model 785, Applied Biosystems, Foster City, CA) adjusted to a wavelength of 213 nm; the column ( $4.6 \times 125$  mm) was packed with Nucleosil 5-C18 (Phenomenex, Torrance, CA). The eluent solution consisted of 10 mM potassium phosphate, pH 7.4/acetonitrile/methanol (366:280:200, v/v/v) and was delivered at a constant rate of 1.2 ml/min. Chromatograms were quantitated using a Hewlett-Packard 3396A integrator (Hewlett-Packard, Avondale, PA). Least-squares linear regression analysis was used to determine the concentration range for 4-OH and 1'-OH midazolam. The peak-area ratios of 4-OH and 1'-OH midazolam were compared to an internal standard (diazepam). The calibration curves prepared with chemical standards were linear over a range of 30–800 ng/ml for both 4-OH and 1'-OH midazolam. The standard curve had an  $r^2 = 0.998 \pm 0.00082$  with a coefficient of variation of 6.2%. The lower limit of sensitivity of this assay was 15 ng/ml for both metabolites.

#### Statistical Analysis

Two-way analysis of variance was used to determine if phenobarbital induction or LPS administration affected plasma NOx levels or cytochrome P450 content and activity. Transformed (logarithm—base 10) data were used in the analysis to homogenize the variance (the max:min variance ratios of the transformed data were less than 5). An interaction term was included to test the hypothesis that a supraadditive or infraadditive effect of phenobarbital induction and endotoxemia was present. The effect of NOS inhibition with aminoguanidine and L-NMMA was assessed by unpaired *t*-test. Regression analysis using the least-squares method was performed with NOx levels as the independent variable and P450 content and metabolism as the dependent variables. Data are presented as mean  $\pm$  standard error of mean (SEM) from six rats in each group. Duplicate measurements in each animal were averaged before means were calculated.  $P < 0.05$  was taken as the level of significance.

## Results

### *Lipopolysaccharide-mediated Nitric Oxide Release Inhibits Cytochrome P450 In Vivo*

Pretreatment with phenobarbital caused enzyme induction manifest as a 2.8-fold increase in cytochrome

P450 content, a 2.3-fold increase in formaldehyde formation from ethylmorphine, and a 32-fold increase in the rate of 4-OH and 1'-OH midazolam formation from midazolam compared with that in nontreated animals (table 1). Lipopolysaccharide induced a septic state that reduced cytochrome P450 content and activity in both nontreated and phenobarbital-treated animals. Total microsomal cytochrome P450 content decreased  $36.6 \pm 2.8\%$  in nontreated animals and  $45.7 \pm 1.5\%$  in the phenobarbital-treated group. N-demethylation of ethylmorphine decreased  $55.8 \pm 1.2\%$  in nontreated and  $51.3 \pm 1.6\%$  in phenobarbital-treated rats after 12 h of endotoxemia. Similar results were obtained for hydroxylation of midazolam. 4-OH midazolam formation decreased  $67 \pm 0.9\%$  in microsomes from nontreated and  $63.4 \pm 1.3\%$  in phenobarbital-induced animals; 1'-OH midazolam formation decreased  $65.7 \pm 1.3\%$  in nontreated rats and  $59.8 \pm 2.7\%$  in phenobarbital-treated rats. No interaction between phenobarbital induction and endotoxemia was found for either the content ( $P < 0.084$ ) or the drug metabolizing activity of ethylmorphine ( $P < 0.429$ ) and midazolam ( $P < 0.337$ ; table 2). Plasma NOx concentrations increased approximately 30-fold after 12 h of LPS administration in both nontreated and phenobarbital-treated rats (table 1).

### *Nitric Oxide Synthase Inhibition with Aminoguanidine or N<sup>G</sup>-L-monomethyl-arginine Prevents Loss of Cytochrome P450 Content and Activity In Vivo*

Coadministration with aminoguanidine or L-NMMA decreased, but did not completely suppress nitric oxide synthesis. Plasma NOx concentrations were still increased tenfold compared with control rats (table 1). Nevertheless, this degree of inhibition of nitric oxide synthesis was associated with a significant reduction in the effect of LPS on cytochrome P450 content. Inhi-

Table 2. Analysis of Variance Results

| Variable               | Treatment               |                       | Interaction Term (P value) |
|------------------------|-------------------------|-----------------------|----------------------------|
|                        | Phenobarbital (P value) | Endotoxemia (P value) |                            |
| NOx formation          | NS                      | <0.001                | NS                         |
| P450 content           | <0.001                  | <0.001                | NS                         |
| Formaldehyde formed    | <0.001                  | <0.001                | NS                         |
| 4-OH midazolam formed  | <0.001                  | <0.001                | NS                         |
| 1'-OH midazolam formed | <0.001                  | <0.001                | NS                         |



## HEPATIC DRUG METABOLISM IN SEPSIS

bition of nitric oxide synthesis also blunted the negative effect of LPS on P450 activity as reflected in the metabolism of ethylmorphine and midazolam ( $P < 0.002$ ; table 1). The regression analysis supports the concept that nitric oxide plays an important role in the inhibition of cytochrome P450 content and activity during sepsis. Total cytochrome P450 content (fig. 1) and cytochrome P450-dependent metabolism of ethylmorphine (fig. 2) and midazolam (fig. 3) correlated with plasma NOx concentration in a highly significant inverse relationship ( $P < 0.001$ ). P450 content and activity were greater with nitric oxide synthesis inhibition. Aminoguanidine or L-NMMA given to nontreated rats did not have an effect on P450 content or drug metabolism of ethylmorphine and midazolam (table 1).

## Discussion

The results demonstrate an inverse relationship between nitric oxide synthesis (as reflected by NOx concentrations) and hepatic cytochrome P450 enzyme content after the administration of endotoxin to rats. This correlation was observed in nontreated animals as well as animals with phenobarbital-induced microsomal P450 activity. Partial inhibition of inducible ni-

tric oxide synthase with aminoguanidine or L-NMMA produced intermediate plasma NOx concentrations and P450 content. Parallel changes occurred in the P450-dependent metabolism of ethylmorphine and midazolam, suggesting a relationship between nitric oxide release and the diminished hepatic drug metabolism seen in sepsis, possibly through a direct effect on cytochrome P450. The results of this study compare with those obtained by Khatsenko *et al.*<sup>9</sup> who also demonstrated an inverse correlation between P450 activity and plasma nitrite concentrations in septic rats. In their study, these authors measured the activity of a different P450 isoform probe (CYP 2B1), and used a different nitric oxide synthase inhibitor, N<sup>w</sup>-nitro-L-arginine methyl ester. Our results confirm those of Khatsenko *et al.*<sup>9</sup> and extend the concept to include two different NOS inhibitors and two probes for different P450 specific isoforms responsible for metabolism of two major anesthetic drug categories (CYP 2C6/11 and CYP 3A1/2).

Genetic factors, hormones, exogenous and endogenous inducers, inhibitors, and allosteric activators of P450 regulate the expression and function of P450 isozymes in normal and disease states.<sup>20,21</sup> A reduction during conditions of sepsis of the activity of the cytochrome P450 mixed-function oxidase system has been

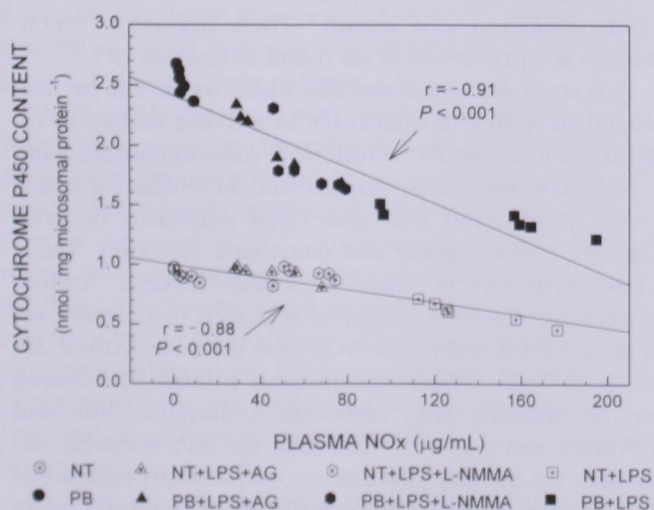

Fig. 1. Total cytochrome P450 content decreased as plasma nitrite and nitrate concentrations increased after lipopolysaccharide injection. Data from nontreated rats (lower line) as well as rats pretreated with phenobarbital (upper line) support the concept that nitric oxide reduces functional P450 content during sepsis. Each data point (symbol) represents the mean of appropriate duplicates from one rat liver ( $n = 48$ ).

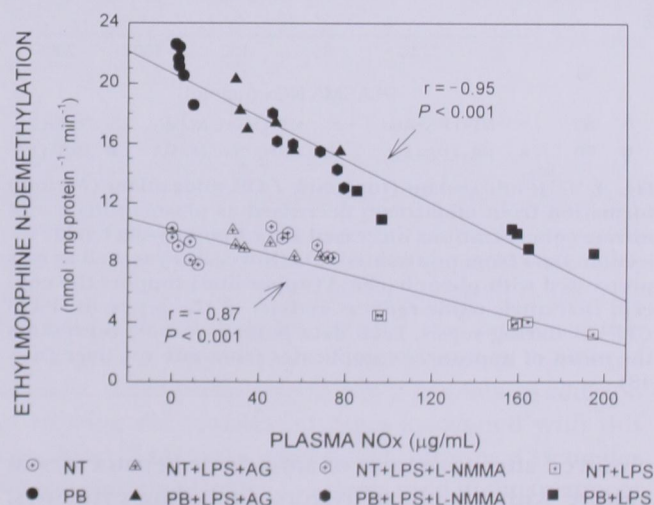

Fig. 2. Formaldehyde formation by N-demethylation from ethylmorphine decreased as plasma nitrite and nitrate concentrations increased after lipopolysaccharide injection. Data from nontreated rats (lower line) as well as rats pretreated with phenobarbital (upper line) support the concept that nitric oxide reduces activity of the probe for P450 CYP2B1, CYP2C6/11 and CYP3A2 during sepsis. Each data point (symbol) represents the mean of appropriate duplicates from one individual rat liver ( $n = 48$ ).



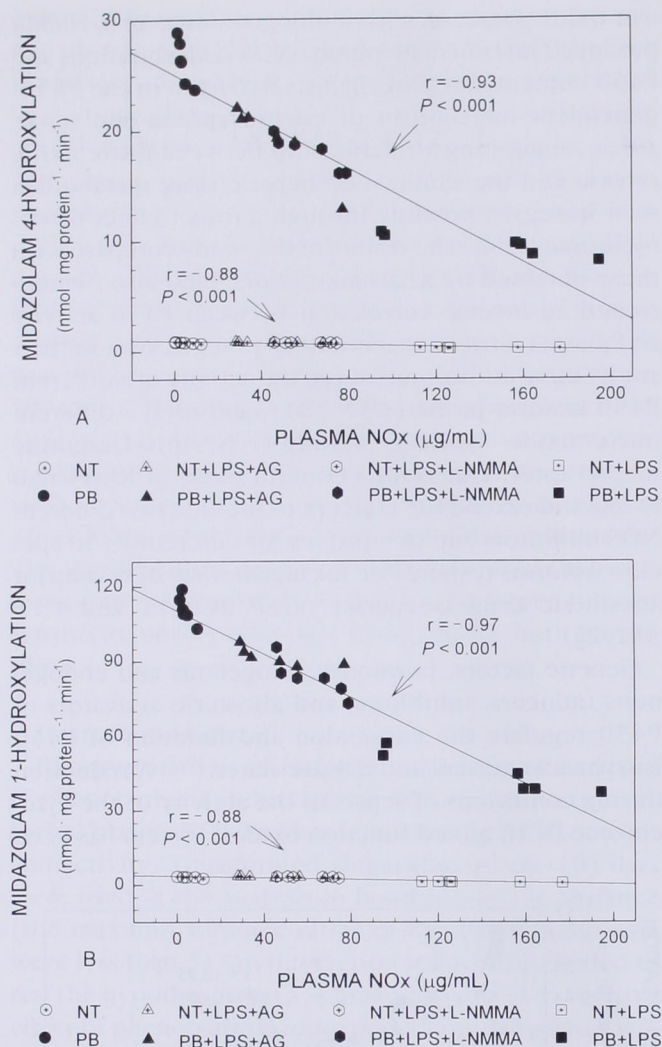

**Fig. 3.** 4-OH-midazolam (top) and 1'-OH-midazolam (bottom) formation from midazolam decreased as plasma nitrite and nitrate concentrations increased after lipopolysaccharide injection. Data from nontreated rats (lower line) as well as rats pretreated with phenobarbital (upper line) support the concept that nitric oxide reduces activity of the probe for P450 CYP3A1 during sepsis. Each data point (symbol) represents the mean of appropriate duplicates from one rat liver ( $n = 48$ ).

observed after treatment of animals or hepatocytes in culture with immunoactivators, including cytokines, and cytokine-releasing agents.<sup>22</sup> As early as the 1960s, it was demonstrated that cytochrome P450 bind nitric oxide,<sup>23</sup> an observation used in numerous studies to examine the heme ligand environment using electron paramagnetic resonance spectroscopy.<sup>24</sup> The questions in this study were whether binding of nitric oxide to cytochrome P450 would affect the functional process

of drug metabolism and whether its effects would be selective for different P450 isoforms.

Induction of hepatic microsomal drug metabolism was introduced in these experiments for two reasons. The first reason was to amplify the quantity of P450 present in the cell system used. The second reason was to consider possible differences between native and induced P450 isoforms in susceptibility to the effects of nitric oxide. Phenobarbital was selected as the inducing drug because of its clinical relevance, its ability to induce all examined subfamilies of P450, and lack of inherent toxicity. Phenobarbital administration to rats induces cytochrome P450 isoforms CYP 2B1, CYP 2C6/11, and CYP 3A1/2.<sup>20</sup> These isoforms are known to metabolize hormones, drugs, and various chemicals.<sup>11</sup> P450 isoforms CYP 2B1, CYP 2C6/11, and CYP 3A2 catalyze ethylmorphine N-demethylation to form formaldehyde.<sup>20</sup> Endotoxin activates a series of inflammatory cells and their mediators, including macrophages, leukocytes, eicosanoids (prostaglandins and leukotrienes), cytokines, and tumor necrosis factor  $\alpha$ ,<sup>4,5,25,26</sup> stimulating formation of inducible NOS in a variety of cells, including macrophages, endothelial cells, hepatocytes, and Kupffer cells.<sup>4-6,27</sup> Many of the metabolic, hemodynamic, and inflammatory changes associated with Gram-negative septicemia are attributable to endotoxin.<sup>5</sup> Nitric oxide synthase in the liver is regulated in part by hormones such as glucocorticoids, glucagon, and insulin.<sup>6</sup> These regulatory mechanisms are preserved in an intact animal model.<sup>25</sup>

This study demonstrates that nitric oxide can be produced in sufficient quantities in a living animal to inhibit cytochrome P450 function. Aminoguanidine and L-NMMA substantially suppressed LPS-induced nitric oxide production and associated decreases in cytochrome P450 content and enzymatic function. These concurrent effects suggest a causal linkage. Aminoguanidine is a NOS inhibitor reported to be more selective for the inducible NOS than the constitutive isoform of NOS.<sup>28</sup> Both compounds inhibit by binding to the arginine site. Although aminoguanidine and L-NMMA did not fully prevent the LPS-induced decrease, we assume that the incomplete prevention of loss of microsomal content and activity *in vivo* is likely caused by incomplete blockade of nitric oxide formation (see plasma NOx concentrations; table 1). We also considered the possibility that L-NMMA might competitively inhibit ethylmorphine metabolism, independent of nitric oxide formation. A similar effect has been demonstrated for the NOS inhibitor, N<sup>ω</sup>-nitro-



L-arginine methyl ester.<sup>9</sup> Indeed, *in vitro* assays in our laboratory indicate that L-NMMA in the millimolar concentration reduces formaldehyde formation from ethylmorphine. This did not occur in the current study, probably because of the relatively small amounts of L-NMMA administered to animals ( $\mu$ moles/kg) compared with the approximately 1,000-fold greater concentrations required to produce direct effects on P450 enzyme function *in vitro*.

Direct exposure of rat hepatic microsomes to nitric oxide inhibits P450 CYP 1A1,<sup>7,10</sup> CYP 2B1/2,<sup>7,9</sup> and CYP 3A1.<sup>29</sup> The results of our study in intact animals confirm the results from previous studies in isolated tissue culture.<sup>7,9,10,29</sup> Inhibition of cytochrome P450 activity by nitric oxide in livers of animals not treated or pretreated with phenobarbital<sup>20</sup> suggests that nitric oxide inhibits the activity of cytochrome P450 derived from more than one molecular family. Our results confirm that this is true for at least two more probes for metabolism of P450 isoforms. This supports the view that nitric oxide inhibition is not selective for specific P450 isoforms.

Bertini *et al.*<sup>30</sup> provide evidence of a dual mechanism for the depression of liver cytochrome P450 by LPS and tumor necrosis factor- $\alpha$ . One pathway is mediated by interleukin-1, a potent regulator of immunologic response and inflammatory reactions that inhibits P450; a second, interleukin-1-independent pathway is involved in the acute phase response.<sup>30</sup> Our data suggest that nitric oxide may participate directly in the interleukin-1-independent pathway.

Nitric oxide interacts with P450 by binding to the intact hemoprotein. Introduction of nitric oxide to P450 proteins has previously been shown to produce strong iron-nitrosyl complexes with both the ferric and ferrous forms of P450.<sup>24</sup> Nitric oxide reacts with hemoprotein at nearly diffusion-controlled rates,<sup>31</sup> and inhibits cytochrome P450 activity by both reversible and irreversible mechanisms.<sup>7</sup> Therefore, the inhibition may be explained by binding of nitric oxide to the heme moiety of the P450s, subsequently preventing the binding of oxygen that normally occurs in the catalytic cycle.

Another interpretation of the results in this study might be the suggestion that nitric oxide could impair P450 function by nitrosation, thus promoting degradation of either heme or apoprotein moieties of P450.<sup>32</sup> It has been reported that the transcription of cytochrome P450 genes is decreased by immunostimulants and cytokines<sup>25</sup> and has been demonstrated at the mRNA

level for CYP 1A1, at least under acute conditions *in vitro*.<sup>10</sup> Under the relatively acute conditions of our experimental protocols, however, we believe the LPS effect on drug metabolism is more likely mediated by functional inactivation of preexisting cytochromes than by inhibiting the process of cytochrome synthesis *de novo*. Lipopolysaccharide was administered only during the last 12 h after a 96-h microsomal induction period, when P450 content and activity already approached maximum values.

Our findings complement previously published observations<sup>4,5,7,9,10,25-27,29,31,32</sup> that all support the following mechanism for LPS inhibition of hepatic cytochrome P450-dependent metabolism: (1) injection of LPS *in vivo* under conditions of unchanged hormonal and mediator regulation induces the release of a diverse array of cytokines and immunostimulants, which, in turn, induce NOS activity in Kupffer cells and hepatocytes, thereby producing nitric oxide; (2) nitric oxide binds to heme iron in hepatic cytochrome P450 and prevents oxygen binding, thereby blocking enzyme activity; (3) nitric oxide also may promote degradation of cytochrome P450 by nitrosylation of heme or nitrosation of thiols present in P450 apoprotein, or it may impair transcription of heme or thiols present in P450 apoprotein; and (4) *in vivo* inhibition of NOS substantially prevents the loss of total cytochrome P450 content and the reduced activity of isoforms CYP 2B1, CYP 2C6/11, and CYP 3A1/2, as reflected in the metabolism of ethylmorphine and midazolam.

### Clinical Implications

Infection in patients commonly impairs drug metabolism as a result of compromised metabolism of the cytochrome P450. Additionally, drugs such as cyclosporine, cimetidine, nifedipine, and quinidine compete with midazolam for CYP 3A in humans and thus prolong the effect of the hypnotic drug.<sup>33</sup> The results of this investigation suggest that administration of inhibitors of nitric oxide production in septic patients, in addition to treating the vascular changes associated with this condition,<sup>34</sup> also may offer novel, improved strategies for the choices of drugs and doses used in the treatment of patients with severe sepsis based on the relative role of cytochrome P450 in the disposition of these drugs.

In summary, we have demonstrated a relationship between nitric oxide production during sepsis and reduced cytochrome P450 content and activity in intact rats. This relationship may underlie altered drug metabolism in septic humans. Viewed more broadly, the



results from this study raise further questions about possible roles for nitric oxide in the regulation of normal drug metabolism.

The authors thank L. Cohn, for editorial comments, and Dr. N. G. Bircher and M. Young, for help with the statistical analysis.

## References

- Ochoa JB, Udekwu AO, Billiar TR, Curran RD, Cerra FB, Simmons RL, Peitzman AB: Nitrogen oxide levels in patients after trauma and during sepsis. *Ann Surg* 1991; 214:621-6
- Bredt DS, Hwang PM, Glatt CE, Lowenstein C, Reed RR, Snyder SH: Cloned and expressed nitric oxide synthase structurally resembles cytochrome P-450 reductase. *Nature* 1991; 351:714-8
- White KA, Marletta MA: Nitric oxide synthase is a cytochrome P-450 type hemoprotein. *Biochemistry* 1992; 31:6627-31
- Curran RD, Billiar TR, Stuehr DJ, Ochoa JB, Harbrecht BG, Flint SG, Simmons RL: Multiple cytokines are required to induce hepatocyte nitric oxide production and inhibit total protein synthesis. *Ann Surg* 1990; 212:462-9
- Pitner RA, Spitzer JA: Endotoxin and TNF $\alpha$  directly stimulate nitric oxide formation in cultured rat hepatocytes from chronically endotoxemic rats. *Biochem Biophys Res Commun* 1992; 185:430-5
- Moncada S, Palmer RMJ, Higgs EA: Nitric oxide: Physiology, pathophysiology, and pharmacology. *Pharmacol Rev* 1991; 43:109-42
- Wink DA, Osawa Y, Darbyshire JF, Jones CR, Eshenaur SC, Nims RW: Inhibition of cytochromes P450 by nitric oxide and a nitric oxide-releasing agent. *Arch Biochem Biophys* 1993; 300:115-23
- Gorodischer F, Krasner J, McDevitt JJ, Nolan JP, Yaffe SJ: Hepatic microsomal drug metabolism after administration of endotoxin in rats. *Biochem Pharmacol* 1976; 25:351-3
- Khatsenko OG, Gross SS, Rifkind AB, Vane JR: Nitric oxide is a mediator of the decrease in cytochrome P450-dependent metabolism caused by immunostimulants. *Proc Natl Acad Sci U S A* 1993; 90:11147-51
- Stadler J, Trockfeld J, Schmalix WA, Brill T, Siewert R, Greim H, Doehmer J: Inhibition of cytochromes P450 1A by nitric oxide. *Proc Natl Acad Sci U S A* 1994; 91:3559-63
- Guengerich FP, Dannan GA, Wright ST, Martin MV, Kaminsky LS: Purification and characterization of liver microsomal cytochromes P-450: Electrophoretic, spectral, catalytic, and immunochemical properties and inducibility of eight isozymes isolated from rats treated with phenobarbital or  $\beta$ -naphthoflavone. *Biochemistry* 1982; 21:6019-30
- Ladona MG, Spalding DJM, Ekman L, Lindström B, Rane A: Human fetal and adult liver metabolism of ethylmorphine. *Biochem Pharmacol* 1989; 38:3147-55
- Kronbach T, Mathys D, Umeno M, Gonzalez FJ, Meyer UA: Oxidation of midazolam by human liver cytochrome P450III $\lambda$ . *Mol Pharmacol* 1989; 36:89-96
- Shiraki A, Guengerich FP: Turnover of membrane proteins: Kinetics of induction and degradation of seven forms of rat liver microsomal cytochrome P-450, NADPH-cytochrome P-450 reductase, and epoxide hydrolase. *Arch Biochem Biophys* 1984; 235:86-96
- Lowry OH, Rosenbrough NJ, Farr AL, Randall RJ: Protein measurement with the Folin phenol reagent. *J Biol Chem* 1951; 193:265-75
- Fischer CW, Caudle DL, Martin-Wixtrom C, Quattrocchi LC, Tukey RH, Waterman MR, Estabrook RW: High-level expression of functional human cytochrome P450 1A2 in *Escherichia coli*. *FASEB J* 1992; 6:759-64
- Omura T, Sato R: The carbon monoxide-binding pigment of liver microsomes. *J Biol Chem* 1964; 239:2379-85
- Gutzki FM, Tsikas D, Alheid U, Frölich JC: Determination of endothelium-derived nitrite/nitrate by gas chromatography/tandem mass spectrometry using ( $^{15}\text{N}$ )NaNO $_2$  as internal standard. *Biol Mass Spectrom* 1992; 21:97-102
- Nash T: The calorimetric estimation of formaldehyde by means of the Hantzsch reaction. *J Biol Chem* 1953; 55:412-6
- Guengerich PF: Enzymology of Rat Liver Cytochromes P-450 in Mammalian Cytochromes P-450. Volume 1. Edited by Guengerich FP. Boca Raton, CRC, 1987, pp 1-55
- Kraemer MJ, Furukawa CT, Koup JR, Shapiro GG, Pierson WJ, Bierman CW: Altered theophylline clearance during an influenza outbreak. *Pediatrics* 1982; 69:476-80
- Renton KW, Knickle LC: Regulation of hepatic cytochrome P-450 during infectious disease. *Can J Physiol Pharmacol* 1990; 68:777-81
- Miyake Y, Gaylor JL, Mason HS: Properties of a submicrosomal particle containing P-450 and flavoprotein. *J Biol Chem* 1968; 243:5788-97
- O'Keefe DH, Ebel RE, Peterson JA: Studies of the oxygen binding site of cytochrome P450. Nitric oxide as a spin-label probe. *Biol Chem* 1978; 253:3509-16
- Wright K, Morgan ET: Regulation of cytochrome P450IIC1 expression by interleukin-1 $\alpha$ , interleukin-6 and dexamethasone. *Mol Pharmacol* 1991; 39:468-74
- Callery MP, Mangino MJ, Kamei T, Flye MW: Interleukin-1 $\beta$  production by endotoxin-stimulated Kupffer cells is regulated by prostaglandin E $_2$ . *J Surg Res* 1990; 48:523-7
- Hibbs JB Jr, Taintor RR, Vavrin Z: Macrophage cytotoxicity: Role for L-arginine deiminase and imino nitrogen oxidation to nitrite. *Science* 1987; 235:473-6
- Misko TP, Moore WM, Kasten TP, Nickols GA, Corbett JA, Tilton RG, McDaniel ML, Williamson JR, Currie MG: Selective inhibition of the inducible nitric oxide synthase by aminoguanidine. *Eur J Pharmacol* 1993; 233:119-25
- Müller CM, Stiller RL, Kim YM, Lancaster JR, McGowan FX, Watkins WD: Endogenous nitric oxide synthesis mediates the decreased midazolam oxidation in rat liver cytochrome CYP3A1 (altered structure). *FASEB J* 1994; 8:A364 (2107).
- Bertini R, Bianchi M, Erroi A, Villa P, Ghezzi P: Dexamethasone modulation of *in vivo* effects of endotoxin, tumor necrosis factor and interleukin-1 on liver cytochrome P-450, plasma fibrinogen, and serum iron. *J Leukocyte Biol* 1989; 46:254-62
- Doyle MP, Mahapatro SN, Broene RD, Guy JK: Oxidation and reduction of hemoproteins by trioxodinitrate (II). The role of nitrosyl hydride and nitrite. *J Am Chem Soc* 1988; 110:593-9
- Bissell DM, Hammaker LE: Cytochrome P-450 heme and the regulation of hepatic heme oxygenase activity. *Arch Biochem Biophys* 1976; 176:91-102
- Kronbach T, Fischer V, Meyer UA: Cyclosporine metabolism in human liver: identification of a cytochrome P-450III gene family as the major cyclosporine-metabolizing enzyme explains interactions of cyclosporine with other drugs. *Clin Pharmacol Ther* 1988; 43:630-5
- Petros A, Bennett D, Vallance P: Effect of nitric oxide synthase inhibitors on hypotension in patients with septic shock. *Lancet* 1991; 338:1557-8
